# Supplementary material
Source: PubMed Central journal article supplement (PMC5853647)
Supplement: jix524_suppl_supplemental_figures.pdf [file jix524_suppl_supplemental_figures.pdf]

## Supplemental Figures

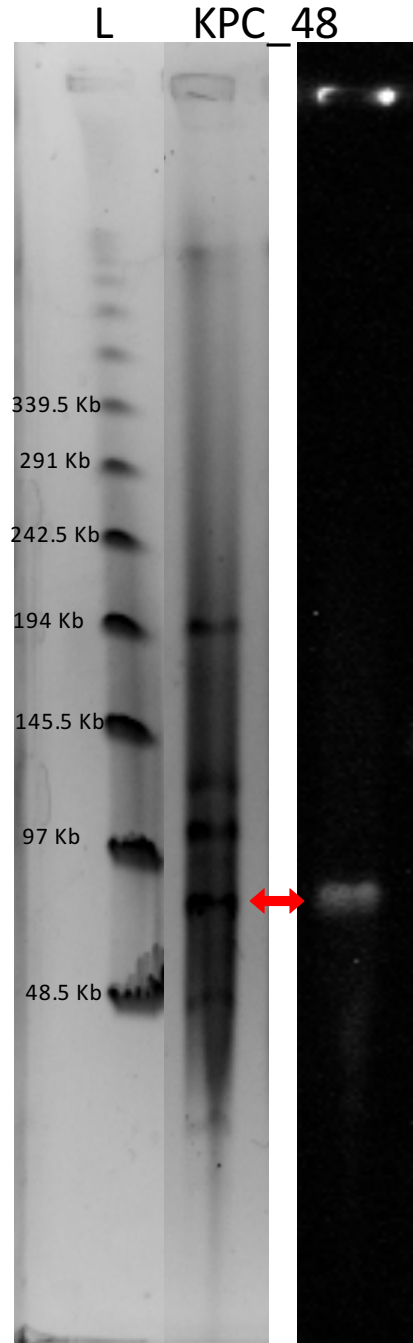

**Figure S1. Plasmid location of *bla*<sub>KPC-2</sub> on isolate KPC\_48 confirmed by S1 pulsed-field gel electrophoresis (PFGE).** Bacterial cells were embedded in agarose and lysed. Resulting DNA containing plugs were incubated with S1 nuclease to convert supercoiled plasmids into full-length linear molecules and subsequently separated by PFGE (left panel) including lambda ladder as reference (L). Finally, a Southern hybridization was performed using *bla*<sub>KPC-2</sub> probe (right panel). Red arrow indicates the plasmid where *bla*<sub>KPC-2</sub> is located.

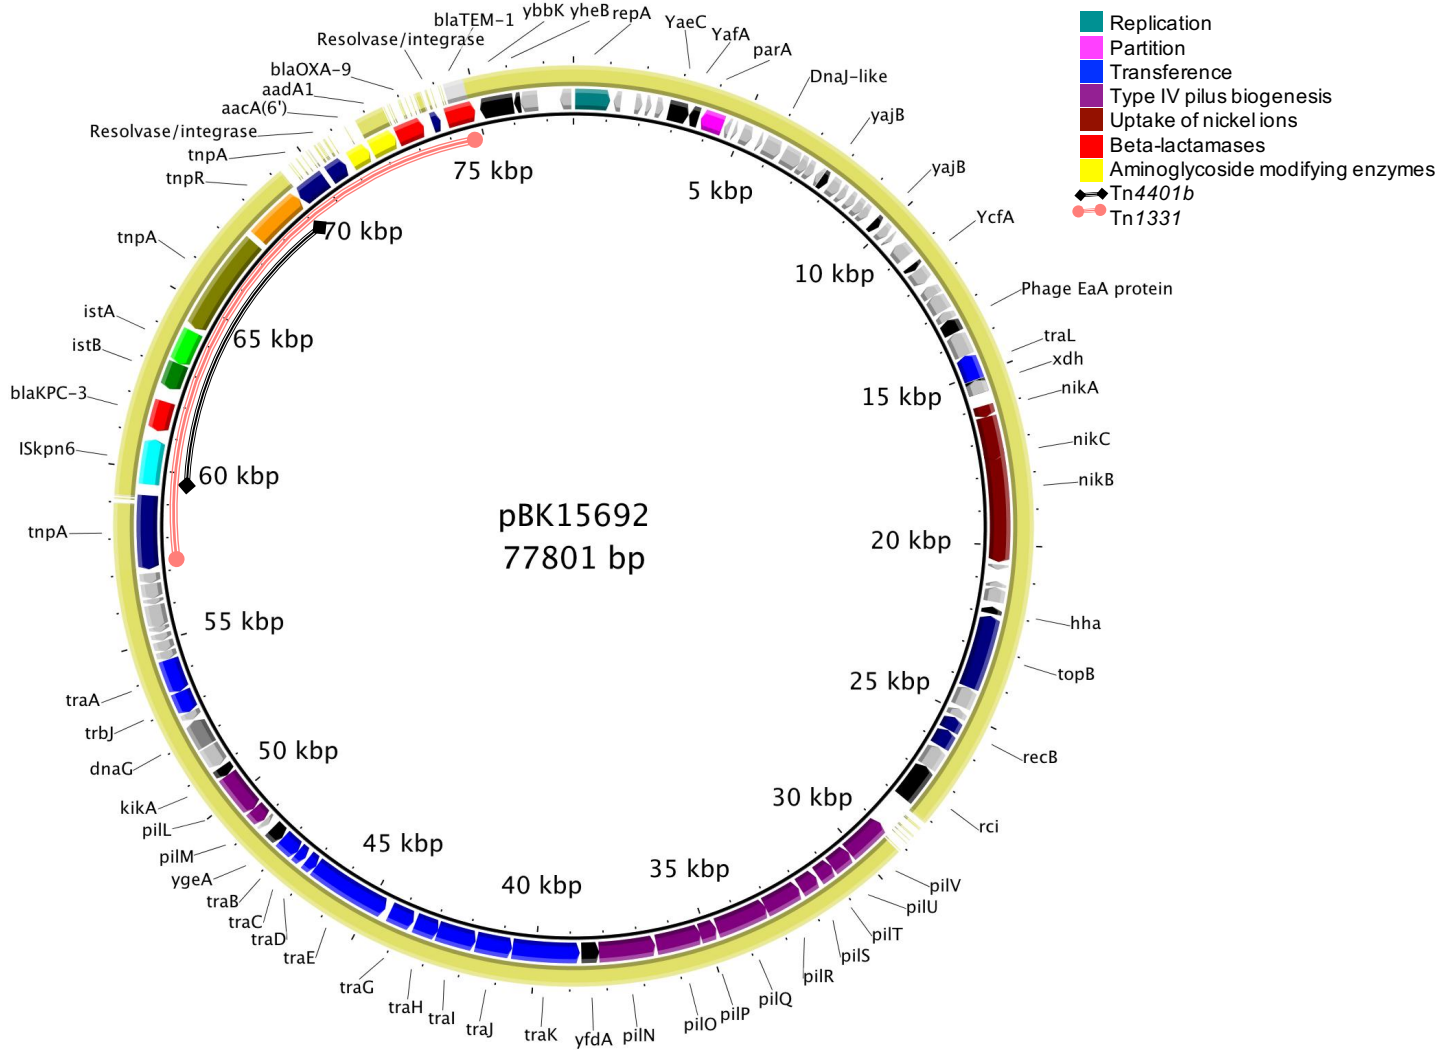

**Figure S2.** Comparison of the IncI2 plasmid pBK15692 (NC\_022520.1) harboring *bla*<sub>KPC-3</sub> with KPC\_48 isolate. Outer ring (yellow) corresponds to the BLASTn result of KPC\_48 contigs relative to the annotated (inside ring) pBK15692 plasmid reference.

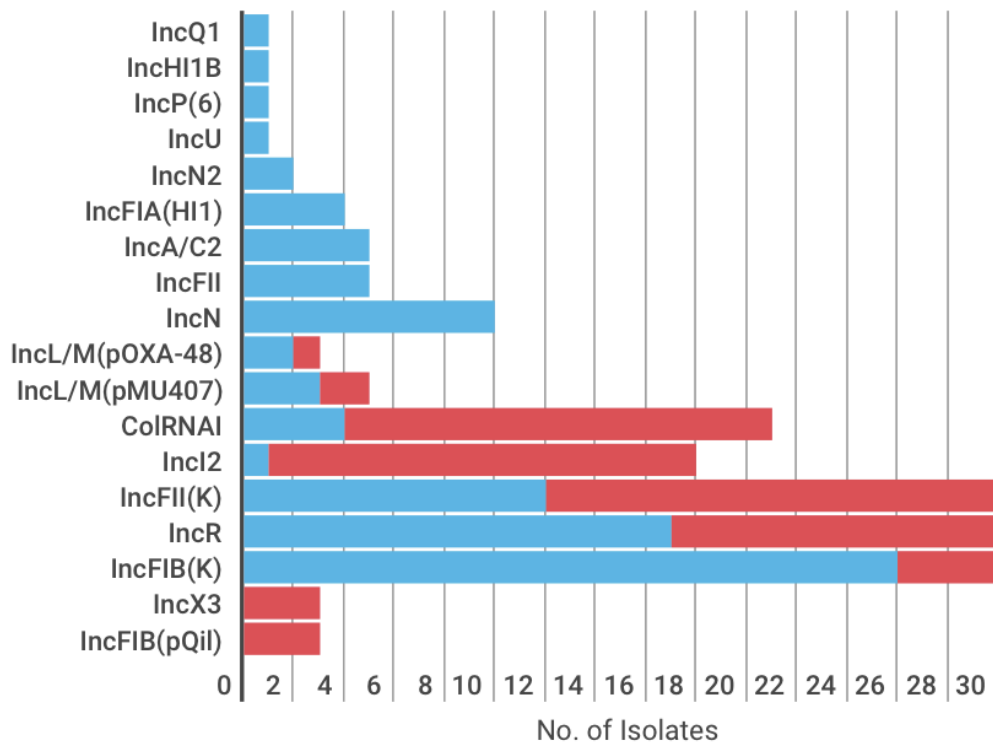

● KPC-2 ● KPC-3

**Figure S3.** Plasmid replicons identified in the Colombian *bla<sub>KPC</sub>* harboring *K. pneumoniae* isolates using PlasmidFinder.

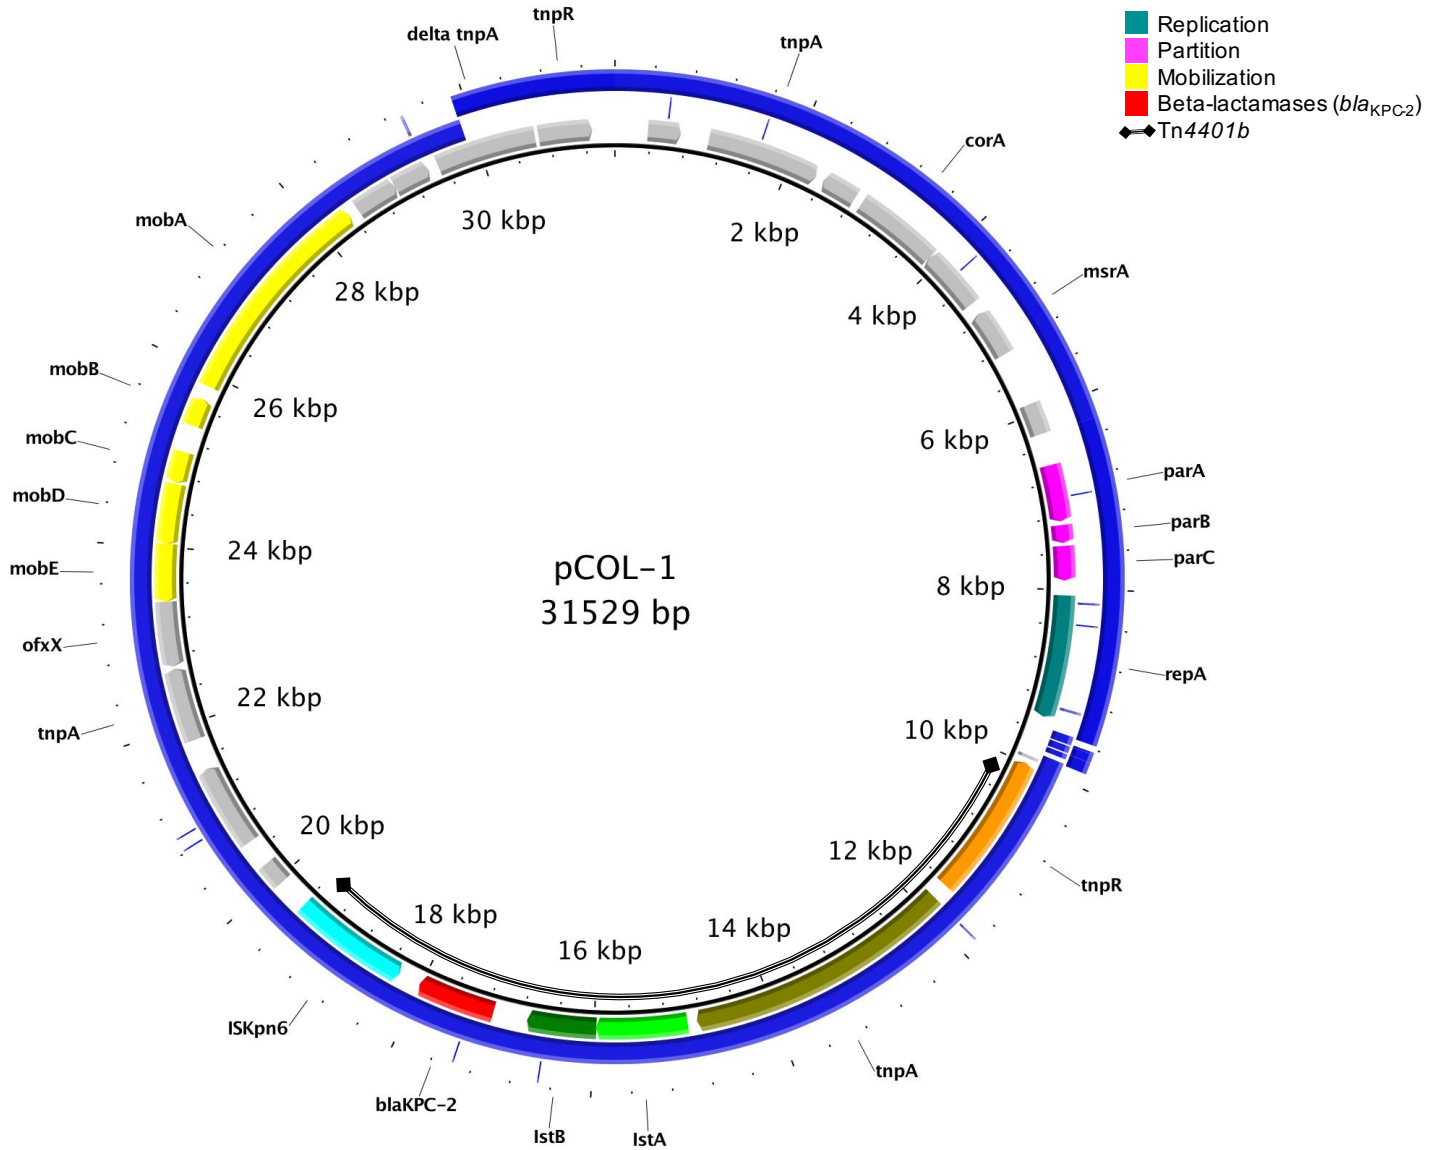

**Figure S4.** Comparison of the IncP6 plasmid pCOL-1 (NC\_022346.1) harboring *bla*<sub>KPC-2</sub> with COLKpn\_66 isolate. Outer ring (blue) corresponds to the BLASTn result of COLKpn\_66 contigs relative to the annotated (inside ring) pCOL-1 plasmid reference.

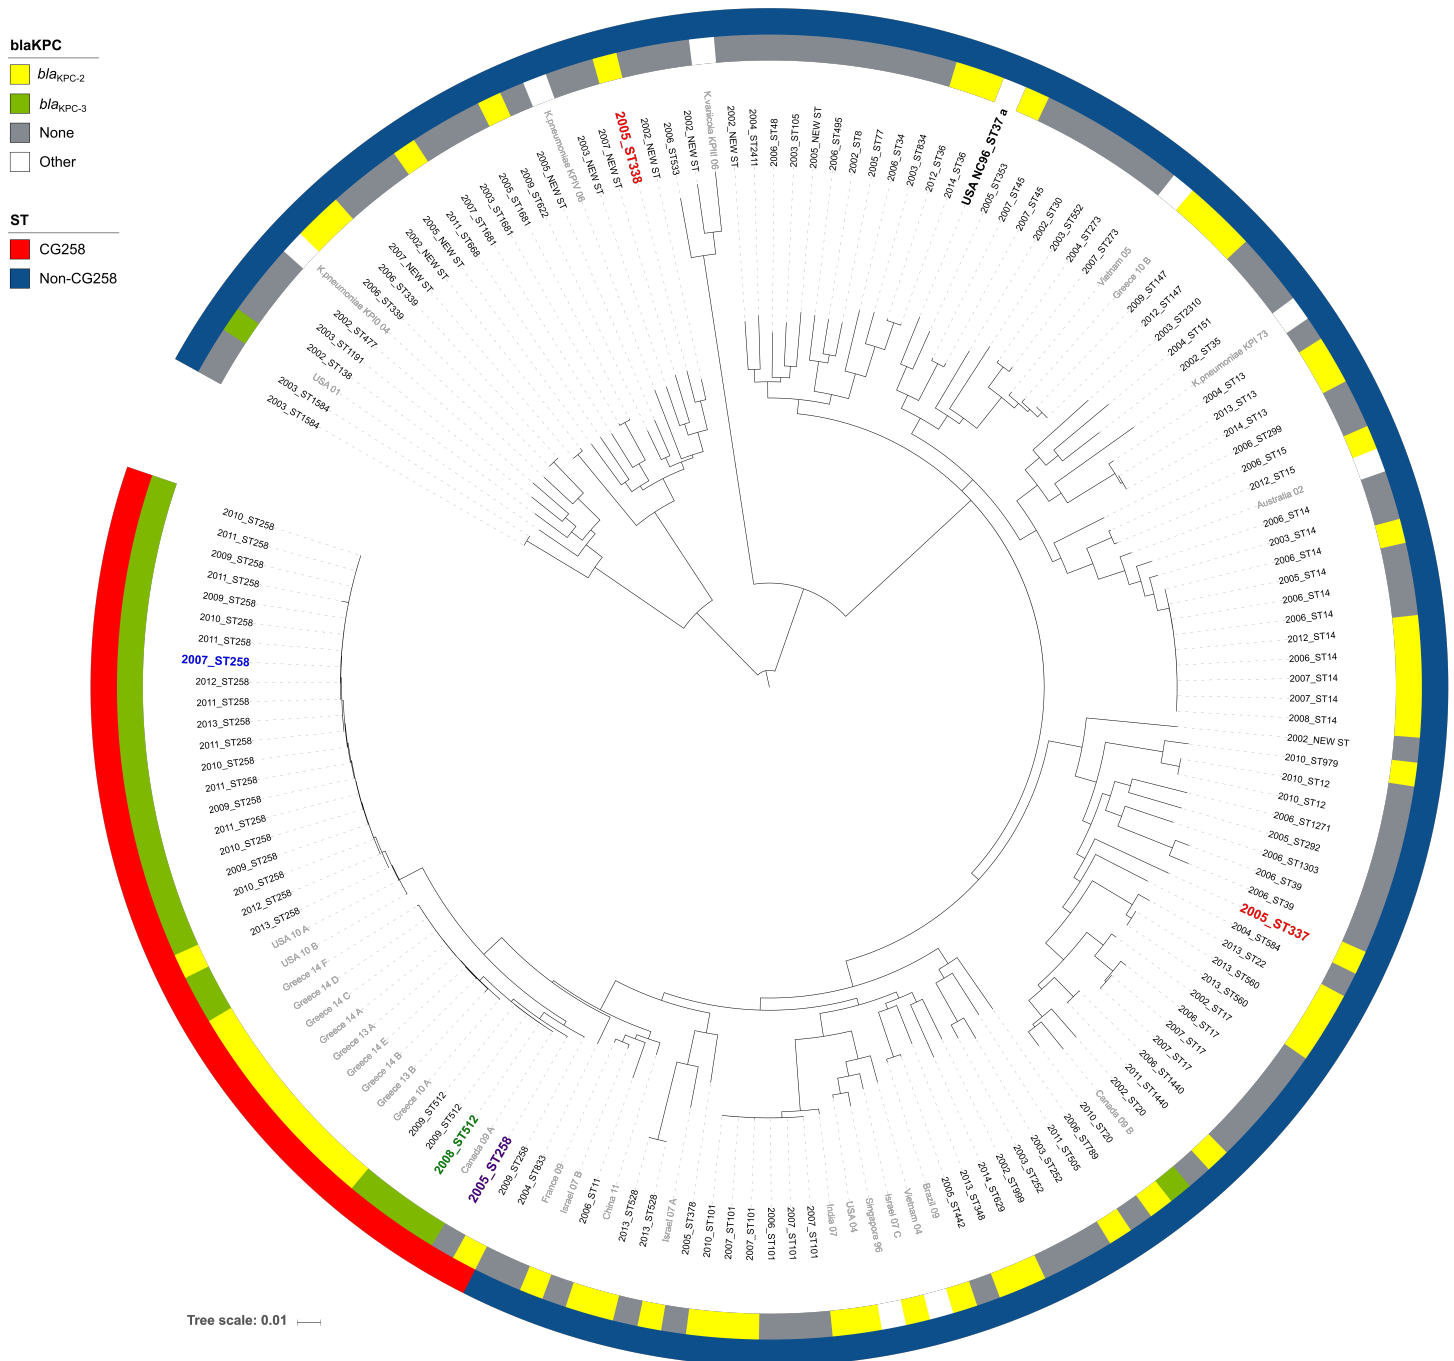

Figure S5. Circular representation of the phylogenetic (retaining annotation based exclusions) generated by RAxML and drawn using the online iTOL program, showing the genetic relationships among 133 Colombian *K. pneumoniae* isolates. Isolates in gray correspond to *K. pneumoniae* isolates from different parts of the world added as reference. Isolates in red correspond to the first two Colombian *K. pneumoniae* isolates described, carrying *bla*<sub>KPC-2</sub>. Isolate in purple, corresponds to the oldest ST258 isolate in our collection. Isolate in blue, corresponds to the oldest ST258 KPC-Kpn isolate in our collection. Isolate in green corresponds to the index isolate from the “Israeli outbreak” in Medellin. <sup>a</sup> First KPC-Kpn reported in the world (North Carolina, USA)
